# Supplementary material for: Magnetism arising from Mexican-hat-like band dispersion in the WSe2/SnS2 heterostructure via interlayer strain
Source: Royal Society of Chemistry journal article supplement (doi:10.1039/d0cp03141k), 2020-01-01
Supplement: d0cp03141k1.pdf [file d0cp03141k1.pdf]

## Supplementary Information

### **Magnetism arising from Mexican-hat like band dispersion in the WSe<sub>2</sub>/SnS<sub>2</sub> heterostructure via interlayer strain**

Shuai Zhang <sup>a\*</sup>, Chong Li <sup>b</sup>, Jimin Shang <sup>c</sup>, Haisheng Li <sup>a</sup>, Zhaowu Wang <sup>a</sup>, Liben Li <sup>a</sup>,  
and Yu Jia <sup>b\*</sup>

*<sup>a</sup>School of Physics and Engineering, Henan University of Science and Technology,  
Luoyang 471023, China.*

*<sup>b</sup>International Laboratory for Quantum Functional Materials of Henan, and School of  
Physics and Microelectronics, Zhengzhou University, Zhengzhou 450001, China.*

*<sup>c</sup>School of Physics and Electronics Engineering, Zhengzhou University of Light  
Industry, Zhengzhou 453002, China.*

*E-mail: [zhangshuai.phys@gmail.com](mailto:zhangshuai.phys@gmail.com), [jiayu@zzu.edu.cn](mailto:jiayu@zzu.edu.cn)*

**Table S1.** The lattice parameters and thickness ( $\text{Se}_{\text{up}} - \text{Se}_{\text{dw}}$ ) of the  $\text{WSe}_2$  layer under different interlayer strains.

| $\varepsilon$                                       | 0%    | 5%    | 10%   | 15%   | 20%   |
|-----------------------------------------------------|-------|-------|-------|-------|-------|
| $\text{Se}_{\text{up}} - \text{Se}_{\text{dw}}$ (Å) | 3.39  | 3.38  | 3.36  | 3.32  | 3.30  |
| Lattice parameter (Å)                               | 6.567 | 6.580 | 6.607 | 6.652 | 6.718 |

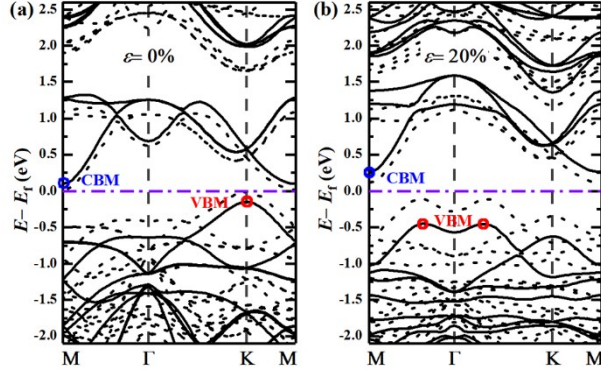

**Fig. S1.** Band structures of  $\text{WSe}_2/\text{SnS}_2$  heterostructure calculated by PBE and HSE06 functionals, under different interlayer strains (a)  $\varepsilon = 0\%$  and (b)  $\varepsilon = 20\%$ , respectively. The dotted lines show the mapping bands of PBE, while the solid lines show the mapping bands of HSE06. All the Fermi levels are set to zero.

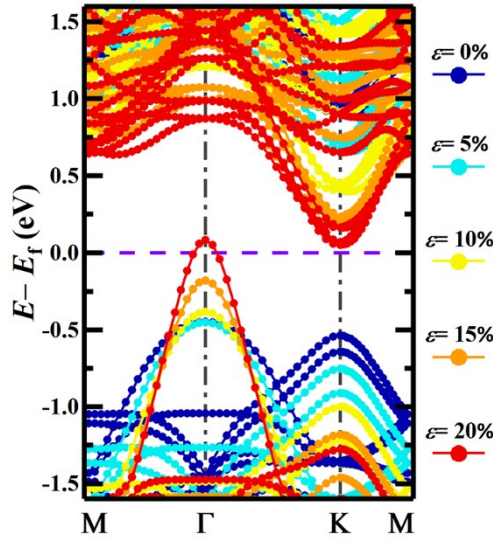

**Fig. S2.** Band structures of bilayer  $\text{WSe}_2$  under different interlayer strains, with the Fermi level being set to zero.
